# Supplementary figures and images for: Characterization of Recruited Mononuclear Phagocytes following Corneal Chemical Injury
Source: MDPI journal article supplement (doi:10.3390/ijms23052574), 2022-02-25

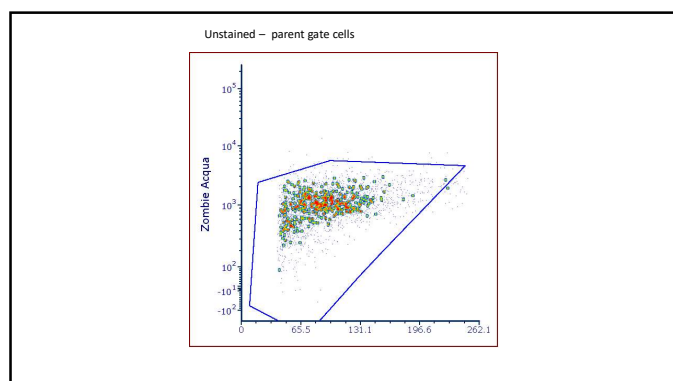

1

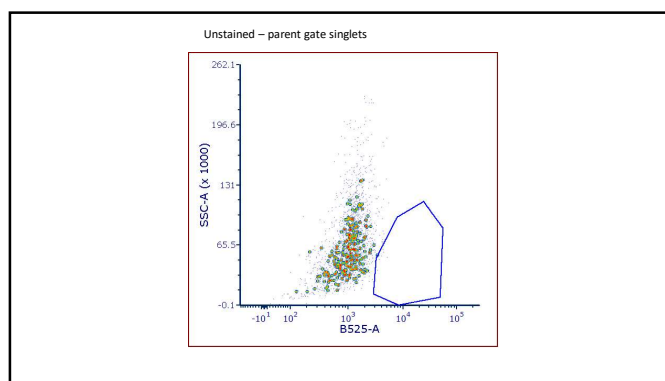

2

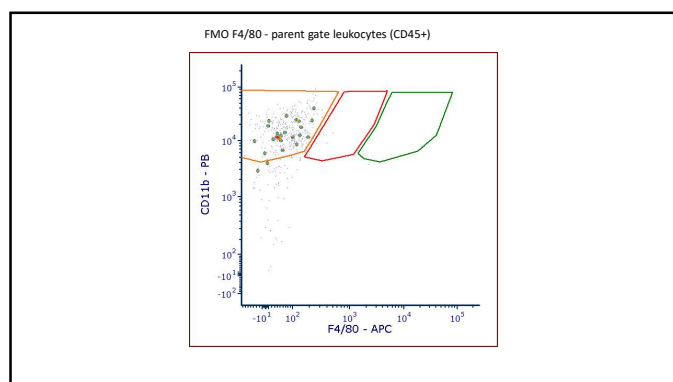

3

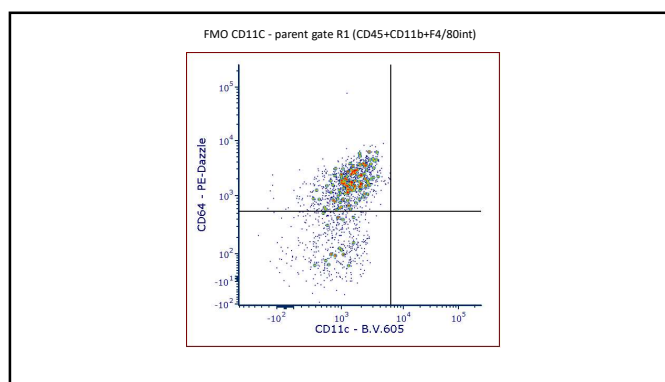

4

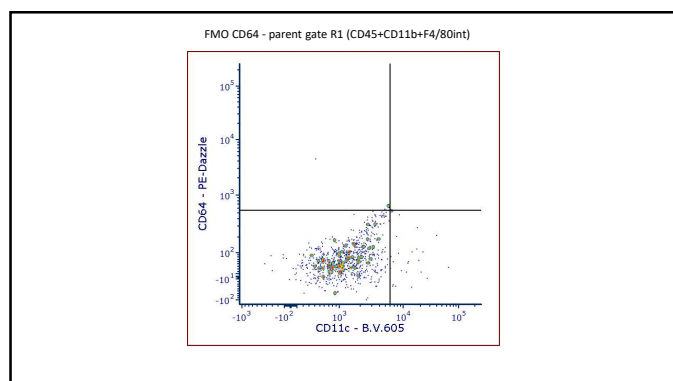

5

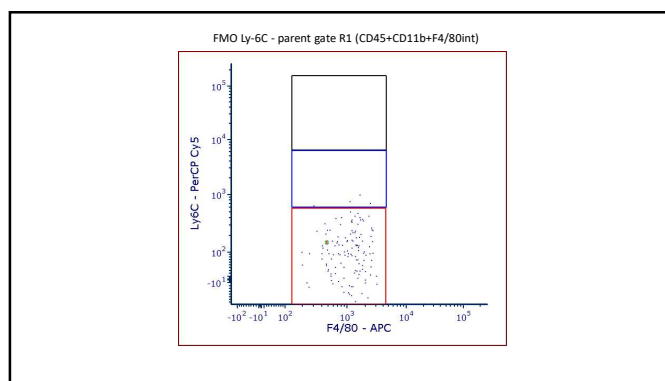

6

Supplement: s1 [file s1]
